# Supplementary material for: Molecular basis of the TRAP complex function in ER protein biogenesis
Source: PubMed Central journal article supplement (PMC10279528; doi:10.1038/s41594-023-00990-0), 2023-05-11
Supplement: 41594_2023_990_MOESM1_ESM.pdf [file 41594_2023_990_MOESM1_ESM.pdf]

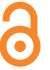

---

# Molecular basis of the TRAP complex function in ER protein biogenesis

---

In the format provided by the authors and unedited

## Supplementary Information Table 1

### Sequence of synthetic RNAi-resistant wildtype TRAPa gene (*syn-trap-1*)

ATGAAGCTTTCCACCGTCTTCCTCCTTGCTGCCCTCGGATTCTGCGCCGTCTACGCT  
GCTGATGTTGTCGATGGAGAGGTCACCGACGATGCTCCAAAGAACTCTCAAGAGG  
ATGACGACCTTACCATCGGAGCTTCCCAGACGCTGGACTCGCTTTCCACTTCGTC  
CAACCATCCGACGCTAACGTCGTCCTGTAATTCTACACTGGAAAGCCAGTTAAGTA  
CCTTATCGGATTCCAGgtaagtttaacatatataactaactaacctgattatttaatttcagACAAGGGAGA  
GAAGGATTTGTTGTTAAGTACGCCGAGACCTCCTTCCGCTTCCCAACCGACCACT  
CTTACCACCTTCAAACTTCACCCGTGGAGAGTACAACCGTCGTGTTGCTCCAAAG  
gtaagtttaaacagttcggtactaactaacatacatatttaatttcagGAGGAGGTTACCCTTGATTACGGATT  
CTACGCTCACGAAACCTTCGCTGGACGTCCAGTCGGACTTGTTGTTAACGTCCACT  
ACCAAGATGCTGATGGAAACGTCTTCGTTAACAACGTTTACAACCAAACCTATCAAC  
ATCATGGAGGATGATTCCGGATTCTCCGGAGAGACTGGATTCTTTTCATTTTCTTC  
GTCGCTCTTCCATCGGAGGACTTTACCTCTCTAACCAATTCCTCTCTAAGCTTTCT  
CGTAAGTCCGGACTTTCCAAGCGTCGTGTCGTCGAGCAAGGAACCTCTTCTGAGGT  
TGATTTTCGAGTGGATCCCACGCGACGCTGTTAAGgtaagtttaaacatgatttactaactaactaatctgat  
ttaatttcagACAAGGAGAAGCGCTCTCCAGCTACCGTTTCTCCAAGGCCCGTAAGT  
CCGCTAAGAAGGCCGACGATTATAAAGATGATGATGATAAAATAA

Lower case = synthetic introns. Grey = FLAG tag.

## Supplementary Information Table 2

### Sequence of synthetic RNAi-resistant wildtype TRAP $\gamma$ gene (*syn-trap-3*)

```
ATGGGAAAGCTTACTAAGGAGGAGGAGCTCCTTCTTTCTTCTTACTCTGCTACCTC
TTCTACTAAGgtaagttaaacaatatataactaactaacctgattattaaatttcagGGAAATCTTTTCTTCTAC
CTTAACGCTCTTATCATCTCCATCGCTCCACTTTACCTTTTCTACGGAGTCCATCAA
ATGGAGATCCAAGATTCTCTCGTCTGCTGGGGACTTTCCGCTGTCGGAACCGCTTA
CCTTCTTTCCCTTGCTTGCAAGAACCAAAAGTGCCTCCTTAAGCACCAAATCGTTA
TGAAGCGTGGATCCGCCGTTGAGCGTGAGATCTCTGGACAATACGCCGCCGATAA
GgtaagttaaacagtcggtactaactaacatacatattaaatttcagAAGATGACCGTCAAGGAGAAGGAG
GAGCGTGCTCTTCCGTAAGgtaagttaaacaatgattttactaactaactaatctgattaaatttcagAACGAG
GTTGCTGATACCGAGTCTACCTACCTTTCTGTTTTCTACACCAACTCTCTTTACCTT
ACCATCATGCTTGTCTCCGCTTTCTTCCTTCTTGCTAACGTTGCCCCAGTCTTCAAC
CTTCTTATCTCTACCATCGGATCCGCTGGACTTGTCGCTTTCCTTTCCACCGCCAAG
AACGATTATAAAGATGATGATGATAAAATAA
```

Lower case = synthetic introns. Grey = FLAG tag.

**Supplementary Information Table 3**

|        | <i>C. elegans</i> strains                                                                                                                                                                                  |
|--------|------------------------------------------------------------------------------------------------------------------------------------------------------------------------------------------------------------|
| DEU156 | gamSi56 [ <i>trap-1p::WT-syn-trap-1-FLAG; icd-2p::mCherry</i> ]                                                                                                                                            |
| DEU157 | gamSi57 [ <i>trap-1p::W228A-K239E-K235E-syn-trap-1-FLAG; icd-2p::mCherry</i> ]                                                                                                                             |
| DEU158 | gamSi58 [ <i>trap-1p::<sup>133</sup>HETFAGR/SSSSSSS<sup>139</sup>-syn-trap-1-FLAG; icd-2p::mCherry</i> ]                                                                                                   |
| DEU159 | gamSi59 [ <i>trap-1p::<sup>133</sup>HETFAGR/SSSSSSS<sup>139</sup>-W228A-K239E-K235E-syn-trap-1-FLAG; icd-2p::mCherry</i> ]                                                                                 |
| DEU160 | gamSi60 [ <i>trap-1p::F98T-Y104T-L106T-F109T-L126T-Y128T-Y131T-V141T-syn-trap-1-FLAG; icd-2p::mCherry</i> ]                                                                                                |
| DEU161 | gamSi61 [ <i>trap-3p::WT-syn-trap-3-FLAG; icd-2p::mCherry</i> ]                                                                                                                                            |
| DEU162 | gamSi62 [ <i>trap-3p::K103E-K104E-K108E-syn-trap-3-FLAG; icd-2p::mCherry</i> ]                                                                                                                             |
| DEU163 | trap-1(gk5960); zcIs4 [ <i>hsp-4p::GFP; loxP + myo-2p::GFP + rps-27p::neoR + loxP</i> ]                                                                                                                    |
| DEU164 | trap-1(gk5960); zcIs4; gamSi56 [ <i>hsp-4p::GFP; loxP + myo-2p::GFP + rps-27p::neoR + loxP; trap-1p::WT-syn-trap-1-FLAG; icd-2p::mCherry</i> ]                                                             |
| DEU165 | trap-1(gk5960); zcIs4; gamSi57 [ <i>hsp-4p::GFP; loxP + myo-2p::GFP + rps-27p::neoR + loxP; trap-1p::W228A-K239E-K235E-syn-trap-1-FLAG; icd-2p::mCherry</i> ]                                              |
| DEU166 | trap-1(gk5960); zcIs4; gamSi58 [ <i>hsp-4p::GFP; loxP + myo-2p::GFP + rps-27p::neoR + loxP; trap-1p::<sup>133</sup>HETFAGR/SSSSSSS<sup>139</sup>-syn-trap-1-FLAG; icd-2p::mCherry</i> ]                    |
| DEU167 | trap-1(gk5960); zcIs4; gamSi59 [ <i>hsp-4p::GFP; loxP + myo-2p::GFP + rps-27p::neoR + loxP; trap-1p::<sup>133</sup>HETFAGR/SSSSSSS<sup>139</sup>-W228A-K239E-K235E -syn-trap-1-FLAG; icd-2p::mCherry</i> ] |
| DEU168 | trap-1(gk5960); zcIs4; gamSi60 [ <i>hsp-4p::GFP; loxP + myo-2p::GFP + rps-27p::neoR + loxP; trap-1p::F98T-Y104T-L106T-F109T-L126T-Y128T-Y131T-V141T-syn-trap-1-FLAG; icd-2p::mCherry</i> ]                 |
| DEU169 | zcIs4; gamSi61 [ <i>hsp-4p::GFP; trap-3p::WT-syn-trap-3-FLAG; icd-2p::mCherry</i> ]                                                                                                                        |
| DEU170 | zcIs4; gamSi62 [ <i>hsp-4p::GFP; trap-3p::K103E-K104E-K108E-syn-trap-3-FLAG; icd-2p::mCherry</i> ]                                                                                                         |
| DEU171 | zcIs4; gamSi56; gamSi61 [ <i>hsp-4p::GFP; trap-1p::WT-syn-trap-1-FLAG; trap-3p::WT-syn-trap-3-FLAG; icd-2p::mCherry</i> ]                                                                                  |
| DEU172 | zcIs4; gamSi56; gamSi62 [ <i>hsp-4p::GFP; trap-1p::WT-syn-trap-1-FLAG; trap-3p::K103E-K104E-K108E-syn-trap-3-FLAG; icd-2p::mCherry</i> ]                                                                   |
| DEU173 | zcIs4; gamSi57; gamSi61 [ <i>hsp-4p::GFP; trap-1p::W228A-K239E-K235E-syn-trap-1-FLAG; trap-3p::WT-syn-trap-3-FLAG; icd-2p::mCherry</i> ]                                                                   |
| DEU174 | zcIs4; gamSi57; gamSi62 [ <i>hsp-4p::GFP; trap-1p::W228A-K239E-K235E-syn-trap-1-FLAG; trap-3p::K103E-K104E-K108E-syn-trap-3-FLAG; icd-2p::mCherry</i> ]                                                    |

|        |                                                                                                                                                                                                                                             |
|--------|---------------------------------------------------------------------------------------------------------------------------------------------------------------------------------------------------------------------------------------------|
| DEU175 | daf-2(e1368); trap-1(gk5960) [daf-2(e1368) III.; <i>loxP</i> + <i>myo-2p::GFP</i> + <i>rps-27p::neoR</i> + <i>loxP</i> ]                                                                                                                    |
| DEU176 | daf-2(e1368); trap-1(gk5960); gamSi56 [daf-2(e1368) III.; <i>loxP</i> + <i>myo-2p::GFP</i> + <i>rps-27p::neoR</i> + <i>loxP</i> ; <i>trap-1p::WT-syn-trap-1-FLAG</i> ; <i>icd-2p::mCherry</i> ]                                             |
| DEU177 | daf-2(e1368); trap-1(gk5960); gamSi57 [daf-2(e1368) III.; <i>loxP</i> + <i>myo-2p::GFP</i> + <i>rps-27p::neoR</i> + <i>loxP</i> ; <i>trap-1p::W228A-K239E-K235E-syn-trap-1-FLAG</i> ; <i>icd-2p::mCherry</i> ]                              |
| DEU178 | daf-2(e1368); trap-1(gk5960); gamSi60 [daf-2(e1368) III.; <i>loxP</i> + <i>myo-2p::GFP</i> + <i>rps-27p::neoR</i> + <i>loxP</i> ; <i>trap-1p::F98T-Y104T-L106T-F109T-L126T-Y128T-Y131T-V141T-syn-trap-1-FLAG</i> ; <i>icd-2p::mCherry</i> ] |

**Supplementary Information Table 4.** Antibodies used in this study

| Antibody           | Source        | Catalog No. | RRID       | Dilution for blotting |
|--------------------|---------------|-------------|------------|-----------------------|
| Rabbit anti-FLAG   | Sigma-Aldrich | F7425       | AB_439687  | 1:2000                |
| Mouse anti-GAPDH   | Proteintech   | 60004-1-Ig  | AB_2107436 | 1:5000                |
| Mouse anti-Tubulin | DSHB          | AA4.3       | AB_579793  | 1:500                 |
