# Supplementary material for: Molecular basis of the TRAP complex function in ER protein biogenesis
Source: PubMed Central journal article supplement (PMC10279528; doi:10.1038/s41594-023-00990-0), 2023-05-11

Source Data – Extended Data Figure 9. Uncropped blots.

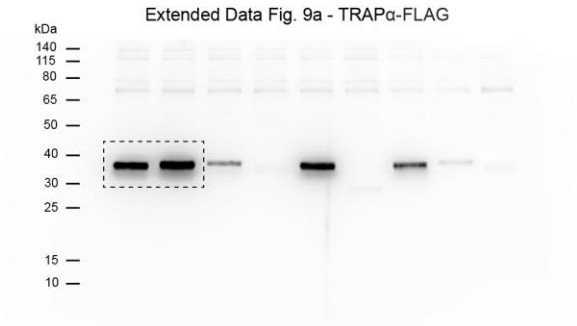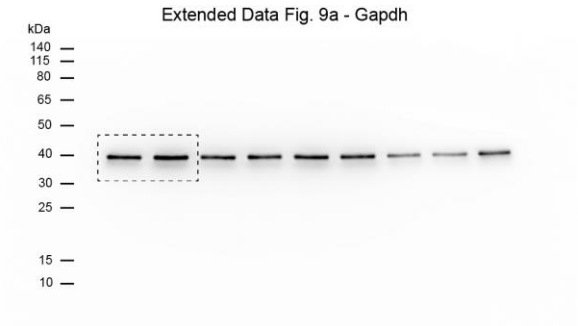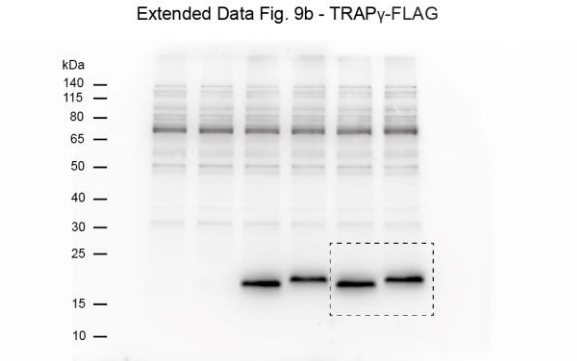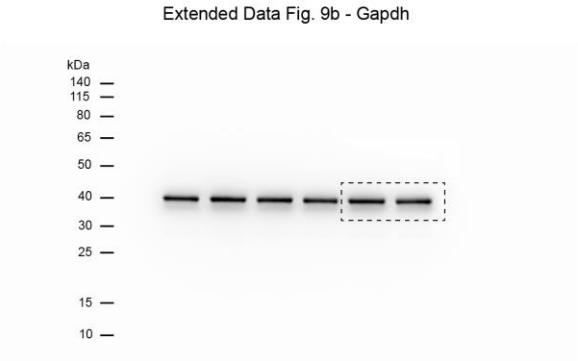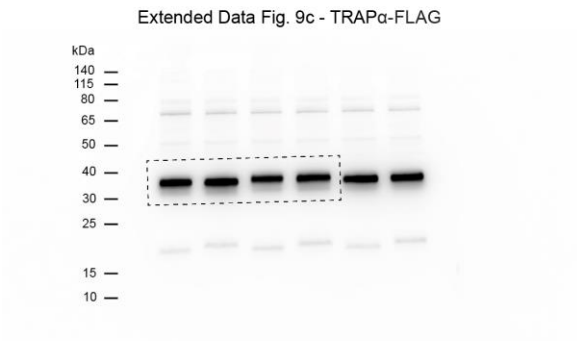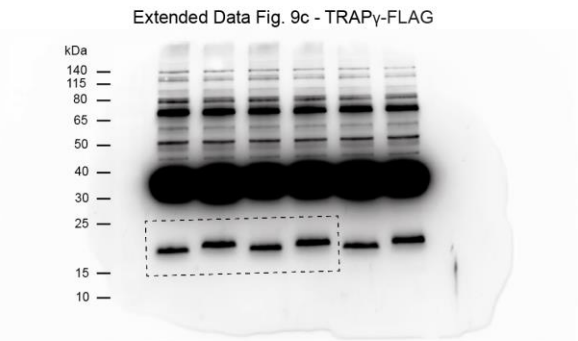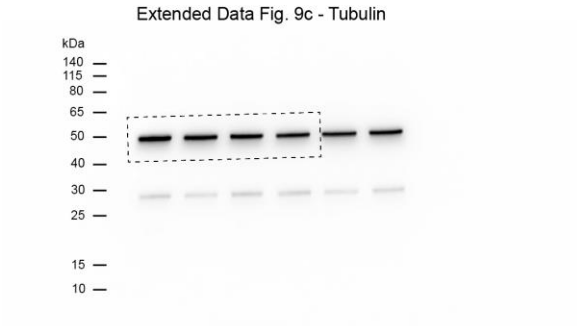

Supplement: 41594_2023_990_MOESM4_ESM.pdf [file 41594_2023_990_MOESM4_ESM.pdf]
